# Supplementary material
Source: publisher site journal article supplement (https://www.spandidos-publications.com/1572/downloadSupplementary)

Figure S1. Bioinformatics analysis of total RNA from *Helicobacter pylori*. Total RNA was sequenced by using Illumina HiSeq2000. According to their genomic locations, tags in the IGR and AM were retained. Candidate sRNAs were defined as those with >20 reads. sRNA, small non-coding RNA; IGR, intergenic region; AM, antisense mRNA.

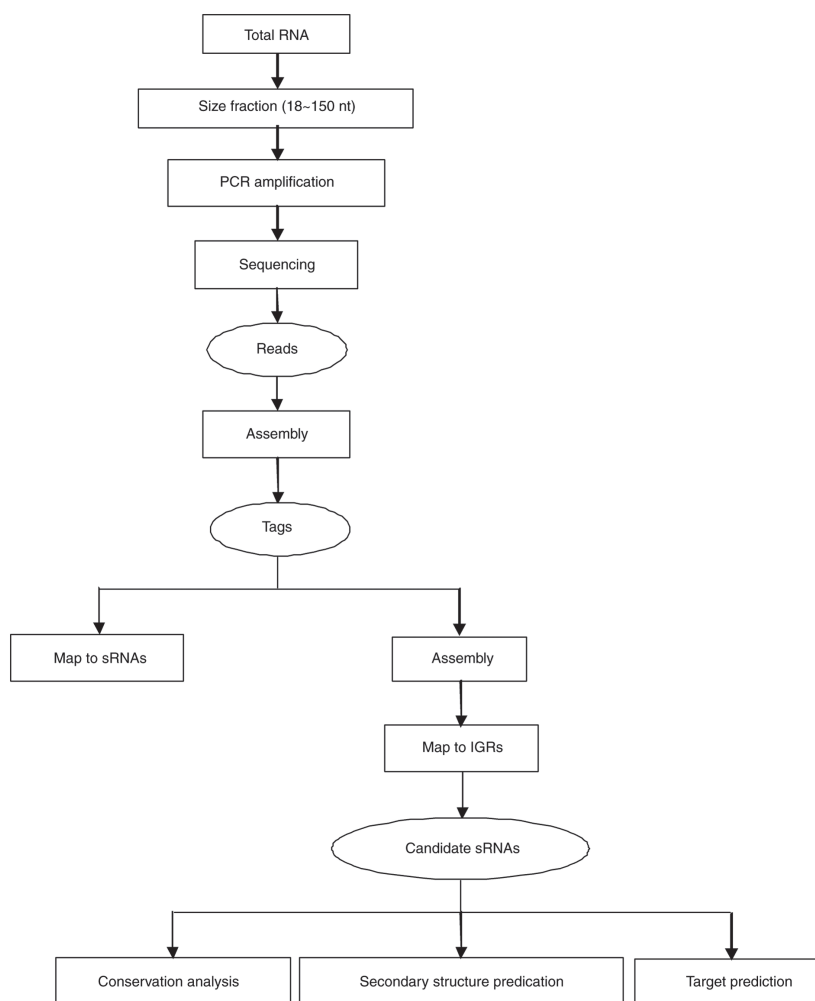

Supplement: Supplementary file 1 [file downloadSupplementary]
